# Supplementary material for: Davidone C Induces the Death of Hepatocellular Carcinoma Cells by Promoting Apoptosis and Autophagy
Source: MDPI journal article supplement (doi:10.3390/molecules26175219), 2021-08-28
Supplement: s1 [file s1]

## Supporting Information

# Davidone C Induces the Death of Hepatocellular Carcinoma Cells by Promoting Apoptosis and Autophagy

Ping Song <sup>1</sup>, Huiqi Huang <sup>2</sup>, Yuanren Ma <sup>2</sup>, Chaoqun Wu <sup>2</sup>, Xinzhou Yang <sup>2,\*</sup> and Ho-Young Choi <sup>3,\*</sup>

<sup>1</sup> School of Chemistry and Chemical Engineering, Qinghai University for Nationalities, Xining 810007, China; spzhe@126.com

<sup>2</sup> School of Pharmaceutical Sciences, South-Central University for Nationalities, Wuhan 430074, China; Hhuiqi@hotmail.com (H.H.); 13007136998@163.com (Y.M.); wcqscuec@126.com (C.W.)

<sup>3</sup> College of Korean Medicine, Kyung Hee University, Seoul 02447, Republic of Korea

\* Correspondence: xzyang@mail.scuec.edu.cn, (X.Y.) Tel.: +86-27-6784-1196 (X.Y.); hychoi@khu.ac.kr (H.-Y.C.); Tel.: +82-2-9619372 (H.-Y.C.)

## CONTENT

|                                                                                                                                                                                                |
|------------------------------------------------------------------------------------------------------------------------------------------------------------------------------------------------|
| <b>Figure S1</b> Original images of Western blotting (Figure 2)                                                                                                                                |
| <b>Figure S2</b> Original images of Western blotting (Figure 4)                                                                                                                                |
| <b>Figure S3</b> Original images of Western blotting (Figure 5)                                                                                                                                |
| <b>Figure S4</b> Original images of Western blotting (Figure 6)                                                                                                                                |
| <b>Figure S5</b> Original images of Western blotting (Figure 7)                                                                                                                                |
| <b>Figure S6</b> HepG2 and Bel-7402 cells were treated with Davidone C, 3-MA, and Davidone C + 3-MA for 24 h and then stained with Annexin V/PI staining and then evaluated by flow cytometry. |

## Figure 2

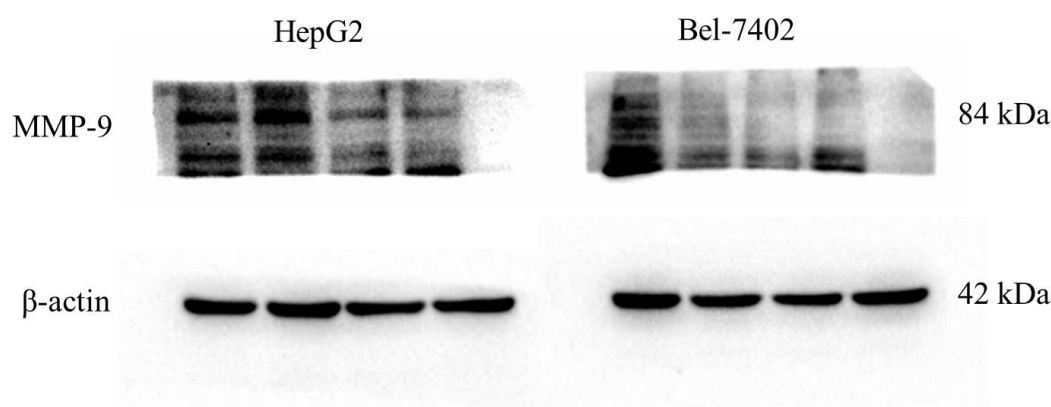

**Figure S1.** Original images of Western blotting (Figure 2).

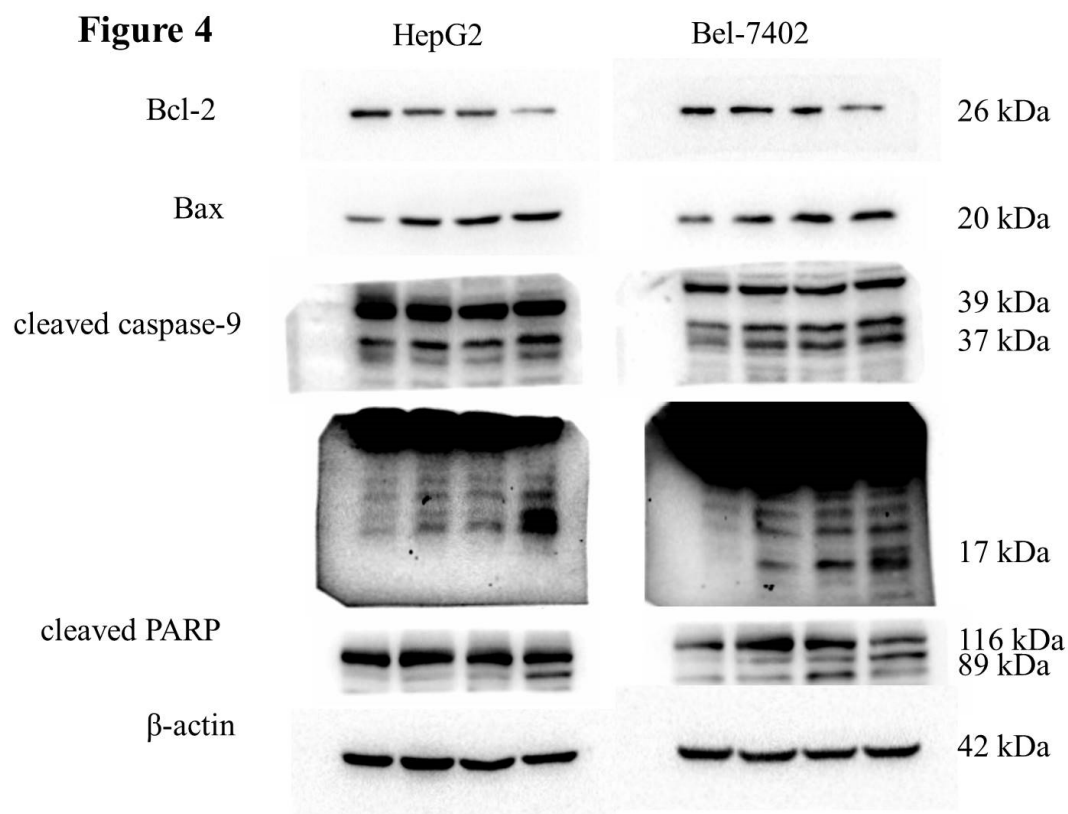

Figure S2. Original images of Western blotting (Figure 4).

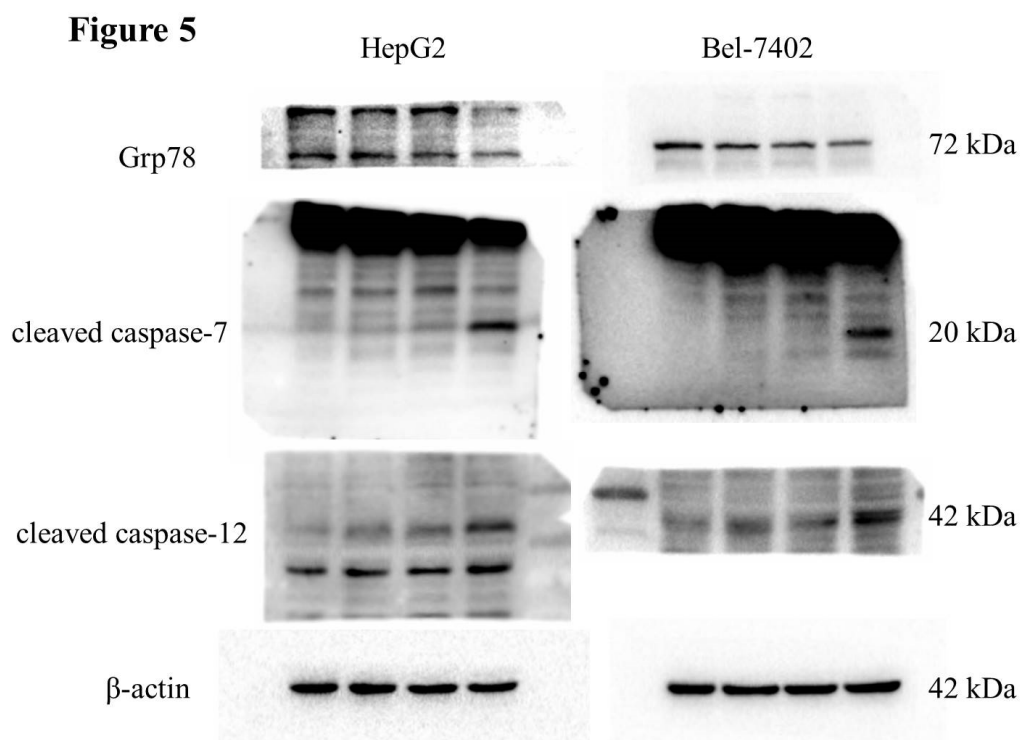

Figure S3. Original images of Western blotting (Figure 5).

**Figure 6**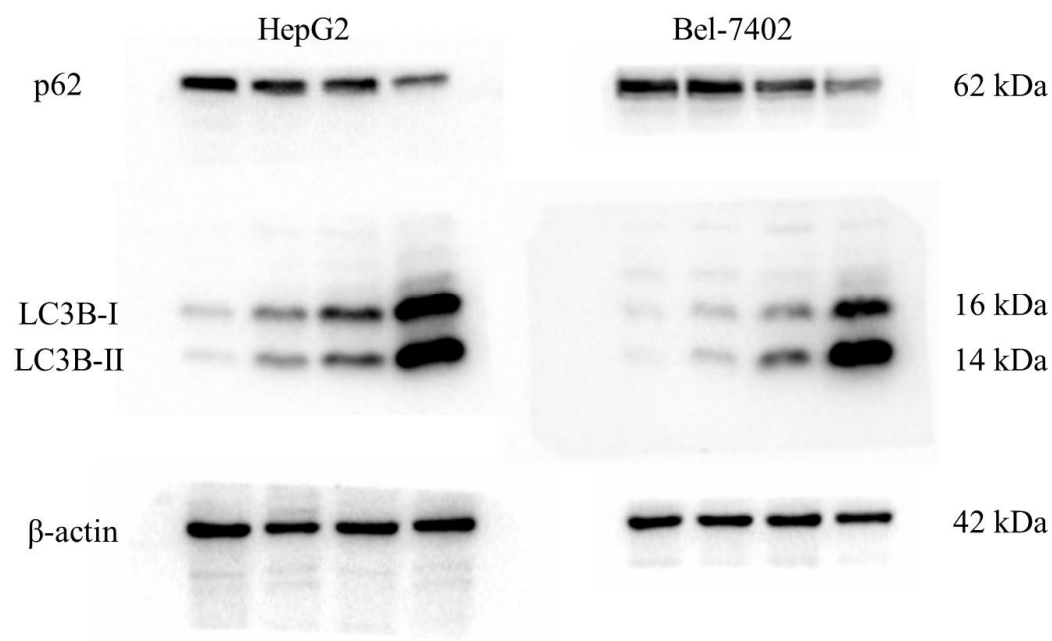**Figure S4.** Original images of Western blotting (Figure 6).**Figure 7**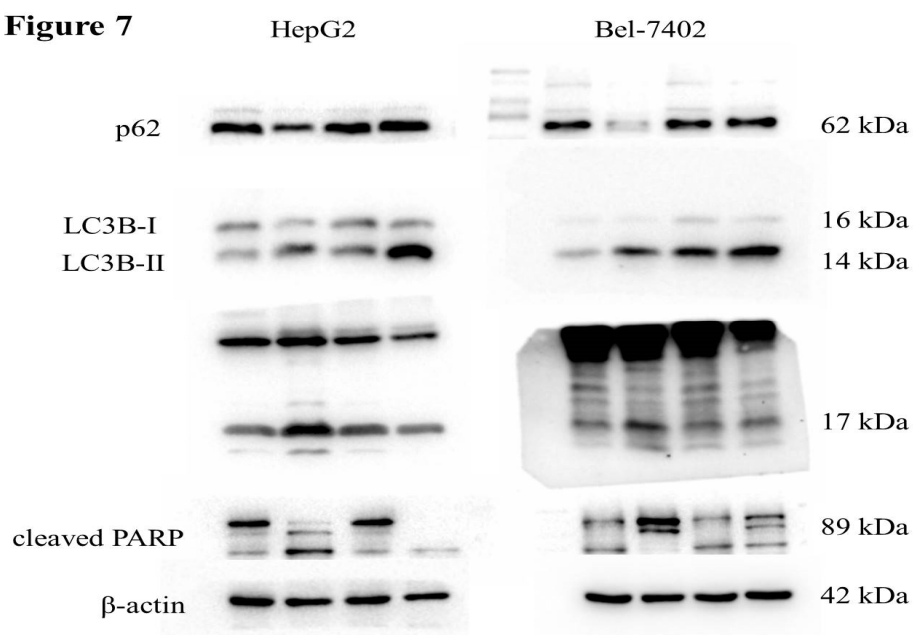**Figure S5.** Original images of Western blotting (Figure 7).

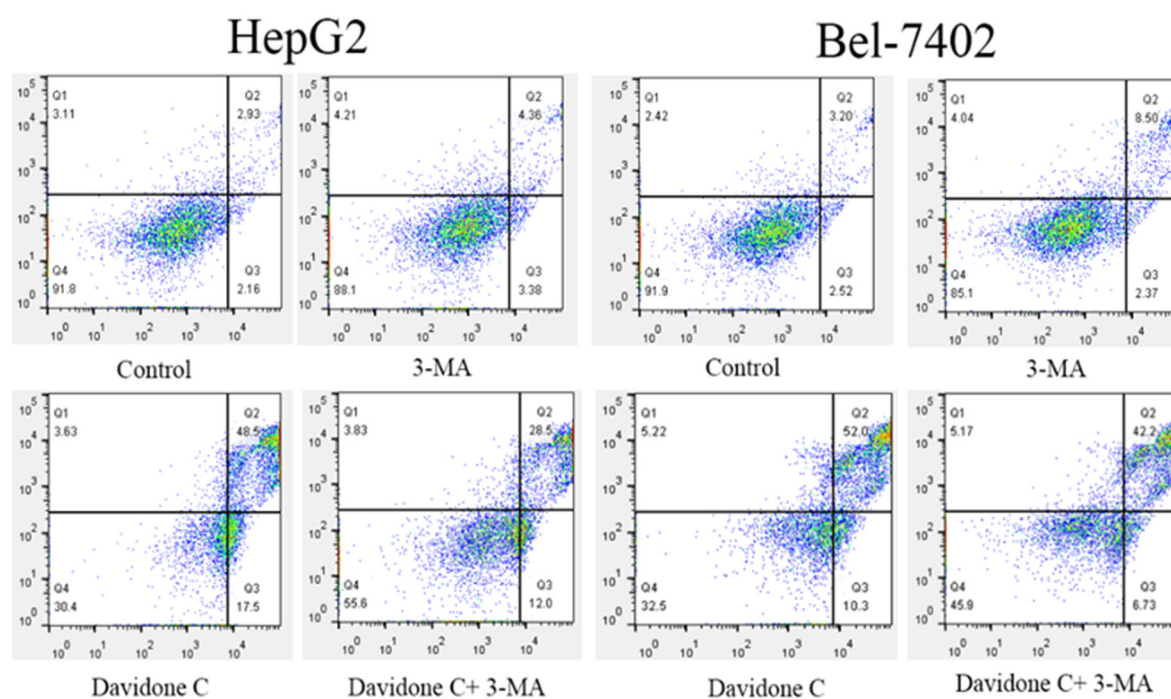

**Figure S6.** HepG2 and Bel-7402 cells were treated with Davidone C, 3-MA, and Davidone C + 3-MA for 24 h and then stained with Annexin V/PI staining and then evaluated by flow cytometry.
